# Supplementary material for: The pattern of Phosphate transporter 1 genes evolutionary divergence in Glycine max L
Source: PubMed Central journal article supplement (PMC3621523; doi:10.1186/1471-2229-13-48), 2013-03-20
Supplement: 1471-2229-13-48-S1.pdf [file 1471-2229-13-48-S1.pdf]

**Additional file 1 A list of known plant *PHT1* genes.**

| Species                         | Gene name | Accession | References |
|---------------------------------|-----------|-----------|------------|
| <i>Glomus versiforme</i>        | GvPT▽     | Q00908    | [1]        |
| <i>Piriformospra indica</i>     | PiPT      | A8N031    | [2]        |
| <i>Neurospora crassa</i>        | PHO5▽     | Q01395    | [3]        |
|                                 | PHO4▽     | P15710    | [4]        |
| <i>Saccharomyces cerevisiae</i> | PHO84▽    | P25297    | [5]        |
|                                 | PHO89▽    | P38361    | [6]        |
| <i>Lycopersicon esculentum</i>  | LePT1▽    | O24029    | [7]        |
|                                 | LePT2     | O22549    | [8]        |
|                                 | LePT3     | Q5MJA7    | [9]        |
|                                 | LePT4*△   | Q563I3    | [10]       |
|                                 | LePT5     | Q563I2    |            |
| <i>Solanum tuberosum</i>        | StPT1▽    | Q43650    | [11]       |
|                                 | StPT2▽    | Q41479    |            |
|                                 | StPT3*▽   | Q8W4W9    | [12]       |
|                                 | StPT4△    | Q5ICC1    | [13]       |
|                                 | StPT5     | Q563I1    | [10]       |
| <i>Nicotiana tabacum</i>        | NtPT1     | Q9ST22    | [14]       |
|                                 | NtPT2     | Q9AYT3    |            |
|                                 | NtPT3     | Q9AYT2    |            |
|                                 | NtPT3     | A0T3D8    | [15]       |
|                                 | NtPT4     | A0T3E1    |            |
|                                 | NtPT5     | A0T3E4    |            |
| <i>Solanum melongena</i>        | SmPT1     | A0T3D3    |            |
|                                 | SmPT2     | A0T3D5    |            |
|                                 | SmPT3     | A0T3D7    |            |
|                                 | SmPT4     | A0T3E0    |            |

|                            |         |                          |      |
|----------------------------|---------|--------------------------|------|
|                            | SmPT5   | A0T3E3                   |      |
| <i>Capsicum frutescens</i> | CfPT1   | A0T3D2                   |      |
|                            | CfPT2   | A0T3D4                   |      |
|                            | CfPT3   | A0T3D6                   |      |
|                            | CfPT4   | A0T3D9                   |      |
|                            | CfPT5   | A0T3E2                   |      |
| <i>Lotus japonicas</i>     | LjPT1   | Q1T6Z7                   | [16] |
|                            | LjPT2   | Q1T6Z6                   |      |
|                            | LjPT3*  | Q1T6Z8                   |      |
| <i>Catharanthus roseus</i> | CrPT1   | O22055                   | [17] |
| <i>Medicago truncatula</i> | MtPT1   | O22301                   | [18] |
|                            | MtPT2▽  | O22302                   |      |
|                            | MtPT3△  | A5H2U5                   | [19] |
|                            | MtPT4*△ | Q8GSG4                   | [20] |
|                            | MtPT5▽  | A5H2U6                   | [19] |
|                            | MtPT6   | B2G3Q0                   |      |
| <i>Lupinus albus</i>       | LaPT1   | Q9ARI9                   | [21] |
|                            | LaPT2   | Q9AU00                   |      |
| <i>Sesbania rostrata</i>   | SrPT1   | Q9AVR0                   |      |
| <i>Triticum aestivum</i>   | TaPh1*  | Q5CC72                   | [22] |
|                            | TaPh2   | Q93WR0                   | [23] |
|                            | TaPh8   | Q7YMD9                   |      |
| <i>Triticum monococcum</i> | TmPT1   | Q5NKQ7                   |      |
| <i>Zea mays</i>            | ZmPHT1  | Q49B46,<br>GRMZM2G154090 | [24] |
|                            | ZmPHT2  | Q49B45,<br>GRMZM2G024935 |      |

|                             |                   |                          |         |
|-----------------------------|-------------------|--------------------------|---------|
|                             | ZmPHT3            | Q49B44,<br>GRMZM2G112377 |         |
|                             | ZmPHT4            | Q49B43,<br>GRMZM2G024935 |         |
|                             | ZmPHT5            | Q49B42,<br>GRMZM2G041595 |         |
|                             | ZmPHT6*           | Q5CC71,<br>GRMZM2G181102 | [22]    |
| <i>Hordeum vulgare</i>      | HvPht1;1▽         | Q8H6E0                   | [25]    |
|                             | HvPT2             | Q84LH9                   |         |
|                             | HvPT3             | Q84VI5                   |         |
|                             | HvPT4             | Q84JQ1                   |         |
|                             | HvPT5             | Q84VI7                   |         |
|                             | HvPht1;6△         | Q8H6D9                   | [25]    |
|                             | HvPT7             | Q84VI6                   |         |
|                             | HvPT8*            | Q6Y3A2                   | [26]    |
|                             | HvPT9             | Q8H6E0                   |         |
| <i>Petunia hybrida</i>      | <i>PhPT1</i>      | B2CPI3                   | [27]    |
|                             | <i>PhPT2</i>      | B2CPI4                   |         |
|                             | <i>PhPT3*</i>     | B2CPI5                   |         |
|                             | <i>PhPT4*</i>     | B2CPI6                   |         |
|                             | <i>PhPT5*</i>     | B2CPI7                   |         |
| <i>Arabidopsis thaliana</i> | <i>AtPHT1;1</i> ▽ | At5g43350                | [28-30] |
|                             | <i>AtPHT1;2</i>   | At5g43370                |         |
|                             | <i>AtPHT1;3</i>   | At5g43360                |         |
|                             | <i>AtPHT1;4</i> ▽ | At2g38940                |         |
|                             | <i>AtPHT1;5</i>   | At2g32830                |         |
|                             | <i>AtPHT1;6</i>   | At5g43340                |         |
|                             | <i>AtPHT1;7</i>   | At3g54700                |         |

|                            |                    |                  |      |
|----------------------------|--------------------|------------------|------|
|                            | <i>AtPHT1;8</i>    | At1g20860        |      |
|                            | <i>AtPHT1;9</i>    | At1g76430        |      |
| <i>Oryza sativa</i>        | <i>OsPT1</i>       | Os03g05620       | [31] |
|                            | <i>OsPT2</i> △     | Os03g05640       |      |
|                            | <i>OsPT3</i>       | Os10g30770       |      |
|                            | <i>OsPT4</i>       | Os04g10750       |      |
|                            | <i>OsPT5</i>       | Os04g10690       |      |
|                            | <i>OsPT6</i> ▽     | Os08g45000       |      |
|                            | <i>OsPT7</i>       | Os03g04360       |      |
|                            | <i>OsPT8</i> ▽     | Os10g30790       |      |
|                            | <i>OsPT9</i>       | Os06g21950       |      |
|                            | <i>OsPT10</i>      | Os06g21950       |      |
|                            | <i>OsPT11</i> *    | Os01g46860       |      |
|                            | <i>OsPT12</i>      | Os03g05610       |      |
|                            | <i>OsPT13</i>      | Os04g10800       |      |
| <i>Populus trichocarpa</i> | <i>PtPHT1;1</i>    | POPTR_0010s08270 | [32] |
|                            | <i>PtPHT1;2</i>    | POPTR_0010s08250 |      |
|                            | <i>PtPHT1;3</i>    | POPTR_0010s08230 |      |
|                            | <i>PtPHT1;4</i>    | POPTR_0005s24490 |      |
|                            | <i>PtPHT1;5</i>    | POPTR_0002s04000 |      |
|                            | <i>PtPHT1;6</i>    | POPTR_0005s15880 |      |
|                            | <i>PtPHT1;7</i>    | POPTR_0005s24500 |      |
|                            | <i>PtPHT1;8</i> *  | POPTR_0019s08990 |      |
|                            | <i>PtPHT1;9</i>    | POPTR_0002s00700 |      |
|                            | <i>PtPHT1;10</i> * | POPTR_0015s06110 |      |
|                            | <i>PtPHT1;11</i>   | POPTR_0005s27740 |      |
|                            | <i>PtPHT1;12</i>   | POPTR_0001s32590 |      |

Note: \*, its expression induced by mycorrhizal fungi; ▽, proteins with Pi high-affinity activity.

△, proteins with Pi low-affinity activity.

## References:

1. Harrison MJ, van Buuren ML: **A phosphate transporter from the mycorrhizal fungus *Glomus versiforme***. *Nature* 1995, **378**(6557):626-629.
2. Yadav V, Kumar M, Deep DK, Kumar H, Sharma R, Tripathi T, Tuteja N, Saxena AK, Johri AK: **A phosphate transporter from the root endophytic fungus *Piriformospora indica* plays a role in the phosphate transport to the host plant**. *J Biol Chem* 2010.
3. Versaw WK, Metzenberg RL: **Repressible cation-phosphate symporters in *Neurospora crassa***. *Proc Natl Acad Sci U S A* 1995, **92**(9):3884-3887.
4. Mann BJ, Bowman BJ, Grotelueschen J, Metzenberg RL: **Nucleotide sequence of *pho-4+*, encoding a phosphate-repressible phosphate permease of *Neurospora crassa***. *Gene* 1989, **83**(2):281-289.
5. Bun-Ya M, Nishimura M, Harashima S, Oshima Y: **The *PHO84* gene of *Saccharomyces cerevisiae* encodes an inorganic phosphate transporter**. *Mol Cell Biol* 1991, **11**(6):3229-3238.
6. Martinez P, Persson BL: **Identification, cloning and characterization of a derepressible *Na+*-coupled phosphate transporter in *Saccharomyces cerevisiae***. *Mol Gen Genet* 1998, **258**(6):628-638.
7. Daram P, Brunner S, Persson BL, Amrhein N, Bucher M: **Functional analysis and cell-specific expression of a phosphate transporter from tomato**. *Planta* 1998, **206**(2):225-233.
8. Liu C, Muchhal US, Uthappa M, Kononowicz AK, Raghothama KG: **Tomato phosphate transporter genes are differentially regulated in plant tissues by phosphorus**. *Plant Physiol* 1998, **116**(1):91-99.
9. Xu GH, Chague V, Melamed-Bessudo C, Kapulnik Y, Jain A, Raghothama KG, Levy AA, Silber A: **Functional characterization of *LePT4*: a phosphate transporter in tomato with mycorrhiza-enhanced expression**. *J Exp Bot* 2007, **58**(10):2491-2501.
10. Nagy R, Karandashov V, Chague V, Kalinkevich K, Tamasloukht M, Xu G, Jakobsen I, Levy AA, Amrhein N, Bucher M: **The characterization of novel mycorrhiza-specific phosphate transporters from *Lycopersicon esculentum* and *Solanum tuberosum* uncovers functional redundancy in symbiotic phosphate transport in solanaceous species**. *Plant J* 2005, **42**(2):236-250.
11. Leggewie G, Willmitzer L, Riesmeier JW: **Two cDNAs from Potato Are Able to Complement a Phosphate Uptake-Deficient Yeast Mutant: Identification of Phosphate Transporters from Higher Plants**. *Plant Cell* 1997, **9**(3):381-392.
12. Rausch C, Daram P, Brunner S, Jansa J, Laloi M, Leggewie G, Amrhein N, Bucher M: **A phosphate transporter expressed in arbuscule-containing cells in potato**. *Nature* 2001, **414**(6862):462-470.
13. Karandashov V, Bucher M: **Symbiotic phosphate transport in arbuscular mycorrhizas**. *Trends Plant Sci* 2005, **10**(1):22-29.
14. Kai M, Takazumi K, Adachi H, Wasaki J, Shinano T, Osaki M: **Cloning and characterization of four phosphate transporter cDNAs in tobacco**. *Plant Science* 2002, **163**(4):837-846.
15. Chen A, Hu J, Sun S, Xu G: **Conservation and divergence of both phosphate- and mycorrhiza-regulated physiological responses and expression patterns of phosphate transporters in solanaceous species**. *New Phytol* 2007, **173**(4):817-831.
16. Maeda D, Ashida K, Iguchi K, Chechetka SA, Hijikata A, Okusako Y, Deguchi Y, Izui K, Hata S:

- Knockdown of an arbuscular mycorrhiza-inducible phosphate transporter gene of *Lotus japonicus* suppresses mutualistic symbiosis.** *Plant Cell Physiol* 2006, **47**(7):807-817.
17. Kai M, Masuda Y, Kikuchi Y, Osaki M, Tadano T: **Isolation and characterization of a cDNA from *Catharanthus roseus* which is highly homologous with phosphate transporter.** *Soil science and plant nutrition* 1997, **43**(1):227-235.
  18. Liu H, Trieu AT, Blaylock LA, Harrison MJ: **Cloning and characterization of two phosphate transporters from *Medicago truncatula* roots: regulation in response to phosphate and to colonization by arbuscular mycorrhizal (AM) fungi.** *Mol Plant Microbe Interact* 1998, **11**(1):14-22.
  19. Liu J, Versaw WK, Pumpkin N, Gomez SK, Blaylock LA, Harrison MJ: **Closely related members of the *Medicago truncatula* PHT1 phosphate transporter gene family encode phosphate transporters with distinct biochemical activities.** *J Biol Chem* 2008, **283**(36):24673-24681.
  20. Harrison MJ, Dewbre GR, Liu J: **A phosphate transporter from *Medicago truncatula* involved in the acquisition of phosphate released by arbuscular mycorrhizal fungi.** *Plant Cell* 2002, **14**(10):2413-2429.
  21. Liu J, Uhde-Stone C, Li A, Vance C, Allan D: **A phosphate transporter with enhanced expression in proteoid roots of white lupin (*Lupinus albus* L.).** *Plant and Soil* 2001, **237**(2):257-266.
  22. Glassop D, Smith S, Smith F: **Cereal phosphate transporters associated with the mycorrhizal pathway of phosphate uptake into roots.** *Planta* 2005, **222**(4):688-698.
  23. Davies TGE, Ying J, Xu Q, Li ZS, Li J, Gordon-Weeks R: **Expression analysis of putative high-affinity phosphate transporters in Chinese winter wheats.** *Plant, Cell & Environment* 2002, **25**(10):1325-1339.
  24. Nagy R, Vasconcelos MJV, Zhao S, McElver J, Bruce W, Amrhein N, Raghothama KG, Bucher M: **Differential Regulation of Five Pht1 Phosphate Transporters from Maize (*Zea mays* L.).** *Plant Biol (Stuttg)* 2006, **8**(02):186,197.
  25. Rae AL, Cybinski DH, Jarmey JM, Smith FW: **Characterization of two phosphate transporters from barley; evidence for diverse function and kinetic properties among members of the Pht1 family.** *Plant Mol Biol* 2003, **53**(1-2):27-36.
  26. Grace EJ, Cotsaftis O, Tester M, Smith FA, Smith SE: **Arbuscular mycorrhizal inhibition of growth in barley cannot be attributed to extent of colonization, fungal phosphorus uptake or effects on expression of plant phosphate transporter genes.** *New Phytol* 2008.
  27. Wegmuller S, Svistoonoff S, Reinhardt D, Stuurman J, Amrhein N, Bucher M: **A transgenic dTph1 insertional mutagenesis system for forward genetics in mycorrhizal phosphate transport of *Petunia*.** *Plant J* 2008, **54**(6):1115-1127.
  28. Muchhal US, Pardo JM, Raghothama KG: **Phosphate transporters from the higher plant *Arabidopsis thaliana*.** *Proc Natl Acad Sci U S A* 1996, **93**(19):10519-10523.
  29. Mudge SR, Rae AL, Diatloff E, Smith FW: **Expression analysis suggests novel roles for members of the Pht1 family of phosphate transporters in *Arabidopsis*.** *Plant J* 2002, **31**(3):341-353.
  30. Okumura S, Mitsukawa N, Shirano Y, Shibata D: **Phosphate transporter gene family of *Arabidopsis thaliana*.** *DNA Res* 1998, **5**(5):261-269.
  31. Paszkowski U, Kroken S, Roux C, Briggs SP: **Rice phosphate transporters include an evolutionarily divergent gene specifically activated in arbuscular mycorrhizal symbiosis.**

*Proc Natl Acad Sci U S A* 2002, **99**(20):13324-13329.

32. Loth-Pereda V, Orsini E, Courty PE, Lota F, Kohler A, Diss L, Blaudez D, Chalot M, Nehls U, Bucher M *et al*: **Structure and expression profile of the phosphate Pht1 transporter gene family in mycorrhizal *Populus trichocarpa***. *Plant Physiol* 2011.
