# Supplementary material for: The pattern of Phosphate transporter 1 genes evolutionary divergence in Glycine max L
Source: PubMed Central journal article supplement (PMC3621523; doi:10.1186/1471-2229-13-48), 2013-03-20
Supplement: 1471-2229-13-48-S2.pdf [file 1471-2229-13-48-S2.pdf]

Additional file 2 The nomenclature of soybean *PHT1*s in different papers

| <b>Gene Identifier</b> | <b><i>GmPHT1</i><br/>(This study)</b> | <b><i>GmPT</i><br/>(Lu et al.<br/>[1])</b> | <b><i>GmPT</i><br/>(Tamura<br/>et al. [2])</b> | <b><i>GmPT</i><br/>(Wu et al.<br/>[3])</b> |
|------------------------|---------------------------------------|--------------------------------------------|------------------------------------------------|--------------------------------------------|
| Glyma10g33030          | <i>GmPHT1;1</i>                       | <i>GmPT7</i>                               | <i>GmPT6</i>                                   | <i>GmPT1</i>                               |
| Glyma03g31950          | <i>GmPHT1;2</i>                       | <i>GmPT2</i>                               | <i>GmPT4</i>                                   | ---                                        |
| Glyma10g00950          | <i>GmPHT1;3</i>                       | <i>GmPT4</i>                               | <i>GmPT13</i>                                  | ---                                        |
| Glyma10g04230          | <i>GmPHT1;4</i>                       | <i>GmPT5</i>                               | <i>GmPT5</i>                                   | ---                                        |
| Glyma20g34610          | <i>GmPHT1;5</i>                       | <i>GmPT13</i>                              | <i>GmPT2</i>                                   | <i>GmPT2</i>                               |
| Glyma10g33020          | <i>GmPHT1;6</i>                       | <i>GmPT6</i>                               | <i>GmPT1</i>                                   | ---                                        |
| Glyma19g34710          | <i>GmPHT1;7</i>                       | <i>GmPT11</i>                              | <i>GmPT12</i>                                  | ---                                        |
| Glyma20g02660          | <i>GmPHT1;8</i>                       | <i>GmPT12</i>                              | <i>GmPT8</i>                                   | ---                                        |
| Glyma07g34870          | <i>GmPHT1;9</i>                       | <i>GmPT3</i>                               | <i>GmPT9</i>                                   | ---                                        |
| Glyma20g34620          | <i>GmPHT1;10</i>                      | <i>GmPT14</i>                              | <i>GmPT14</i>                                  | ---                                        |
| Glyma14g36650          | <i>GmPHT1;11</i>                      | <i>GmPT10</i>                              | <i>GmPT7</i>                                   | ---                                        |
| Glyma14g28780          | <i>GmPHT1;12</i>                      | <i>GmPT9</i>                               | <i>GmPT11</i>                                  | ---                                        |
| Glyma13g08720          | <i>GmPHT1;13</i>                      | <i>GmPT8</i>                               | <i>GmPT10</i>                                  | ---                                        |
| Glyma02g00840          | <i>GmPHT1;14</i>                      | <i>GmPT1</i>                               | <i>GmPT3</i>                                   | ---                                        |
| Glyma13g18420          | <i>GmPHT1;15</i>                      | ---                                        | ---                                            | ---                                        |

'---' indicates genes Not-identified in the paper. The same color background indicates paralogous pair genes.

**References:**

1. Lu Q, Zhao J, Tian J, Chen L, Sun Z, Guo Y, Lu X, Gu M, Xu G, Liao H: **The high-affinity phosphate transporter *GmPT5* regulates phosphate transport to nodules and nodulation in soybean.** *Plant Physiol* 2012.
2. Tamura Y, Kobae Y, Mizuno T, Hata S: **Identification and expression analysis of arbuscular mycorrhiza-inducible phosphate transporter genes of soybean.** *Biosci Biotechnol Biochem* 2012, **76**(2):309-313.

3. Wu Z, Zhao J, Gao R, Hu G, Gai J, Xu G, Xing H: **Molecular Cloning, Characterization and Expression Analysis of Two Members of the Pht1 Family of Phosphate Transporters in *Glycine max***. *PLoS One* 2011, **6**(6):e19752.
