# Supplementary material for: The pattern of Phosphate transporter 1 genes evolutionary divergence in Glycine max L
Source: PubMed Central journal article supplement (PMC3621523; doi:10.1186/1471-2229-13-48), 2013-03-20
Supplement: 1471-2229-13-48-S3.pdf [file 1471-2229-13-48-S3.pdf]

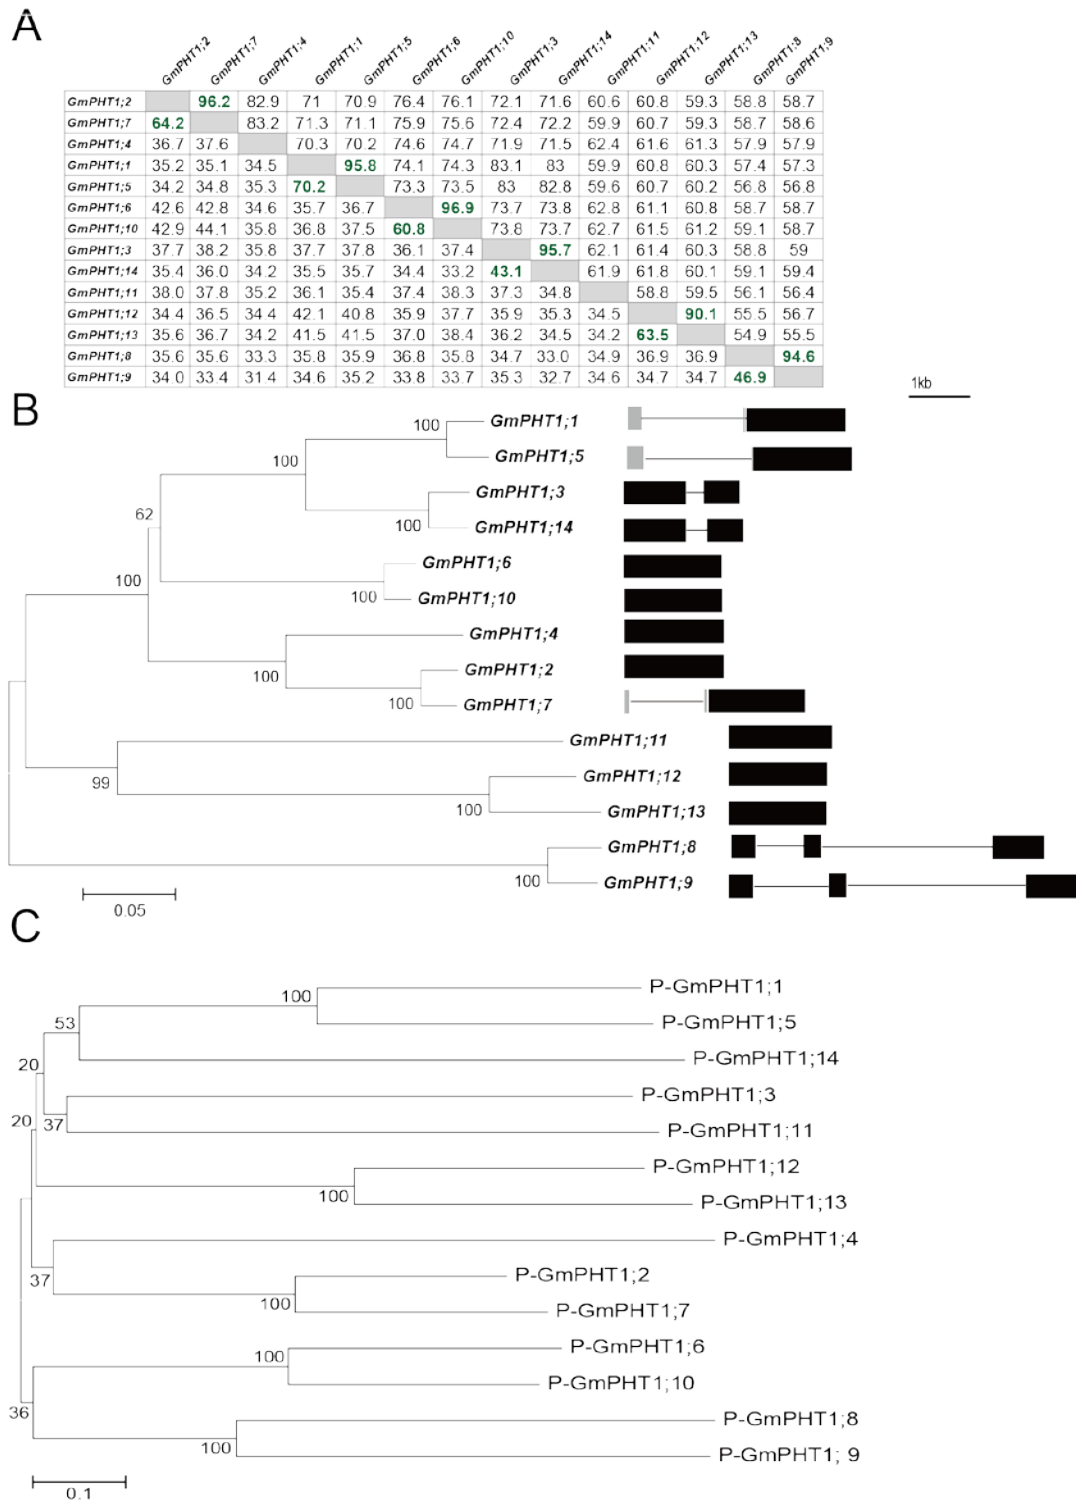

**Additional file 3.** *GmPHT1* promoters, genes and gene structures. A, Sequence similarity between individual *GmPHT1* genes (upper triangle) and their promoters (lower triangle); The similarity between paralogous pairs shown in green. B, Phylogenetic tree of the 14 *GmPHT1* genes based on their DNA sequence. The black numbers shown are bootstrap values, and the

green ones similarity. The structure of the 14 *GmPHT1*s (right) was derived from the genome annotation. Open boxes indicate the CDSs, black lines introns, and red boxes introns in the 5'-UTR. C, Phylogenetic tree of the *GmPHT1* promoters. The black numbers shown are bootstrap values, and the green ones similarity.
