# Supplementary material for: The pattern of Phosphate transporter 1 genes evolutionary divergence in Glycine max L
Source: PubMed Central journal article supplement (PMC3621523; doi:10.1186/1471-2229-13-48), 2013-03-20
Supplement: 1471-2229-13-48-S4.pdf [file 1471-2229-13-48-S4.pdf]

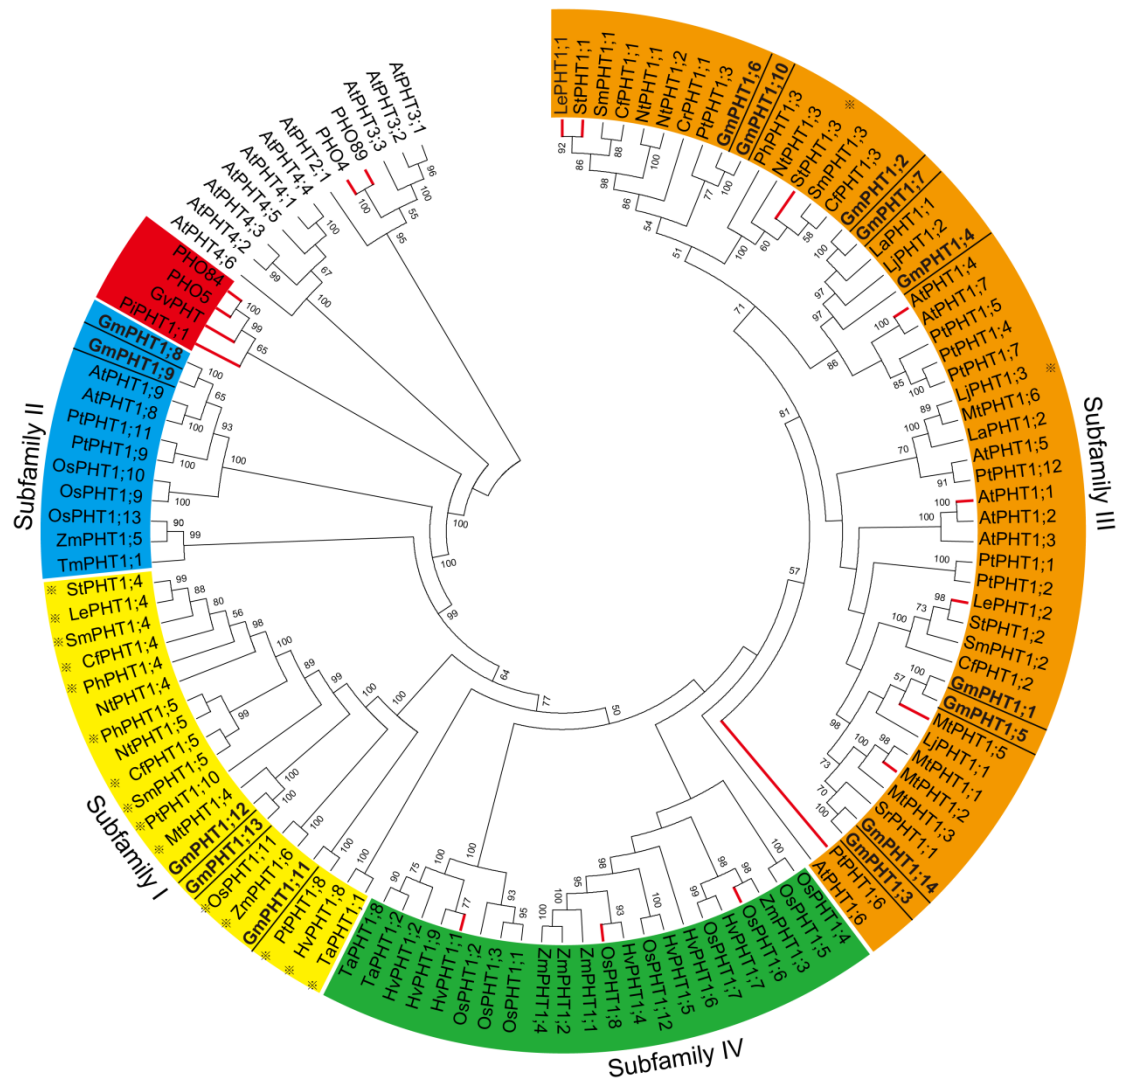

**Additional file 4.** PHT1 phylogenetic tree. The out-groups were AtPHT2, AtPHT3, AtPHT4 and yeast PHO89 and *N. crassa* PHO4 (clear background). The PHT1 family in fungi is shown with a red background, the dicotyledonous and monocotyledonous subfamily II with a blue background, the AM-induced di- and mono-cotyledonous subfamily I with a yellow background, the monocotyledonous subfamily IV with a green background, and the dicotyledonous subfamily III with an orange background.
