# Supplementary material for: The pattern of Phosphate transporter 1 genes evolutionary divergence in Glycine max L
Source: PubMed Central journal article supplement (PMC3621523; doi:10.1186/1471-2229-13-48), 2013-03-20
Supplement: 1471-2229-13-48-S7.pdf [file 1471-2229-13-48-S7.pdf]

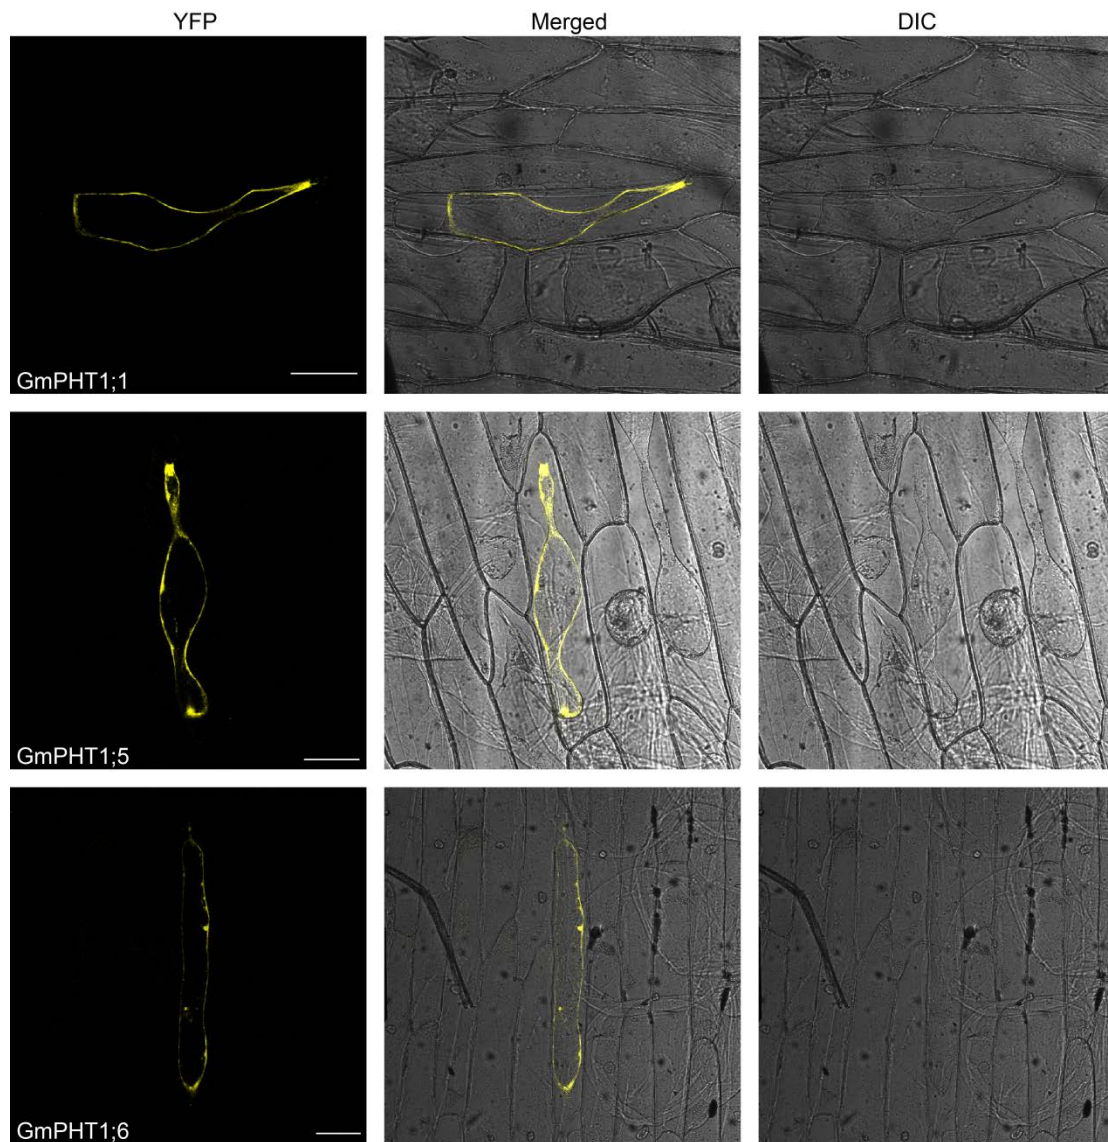

**Additional file 7.** Transient transcription of the *GmPHT1;1-YFP*, *GmPHT1;5-YFP* and *GmPHT1;6-YFP* fusions in plasmolyzed onion epidermal cells. DIC: differential interference contrast. Scale bar: 50  $\mu\text{m}$ .
