# Supplementary material for: The pattern of Phosphate transporter 1 genes evolutionary divergence in Glycine max L
Source: PubMed Central journal article supplement (PMC3621523; doi:10.1186/1471-2229-13-48), 2013-03-20
Supplement: 1471-2229-13-48-S8.pdf [file 1471-2229-13-48-S8.pdf]

A

PHO84 : 176 GGDYPLSIIITSE  
 AtPHT1;1 : 142 GGDYPLSATIMSE  
 AtPHT1;4 : 142 GGDYPLSATIMSE  
 MtPT4 : 139 GGDYPLSATIMSE  
 GmPHT1;2 : 142 GGDYPLSATIMSE  
 GmPHT1;7 : 142 GGDYPLSATIMSE  
 GmPHT1;4 : 142 GGDYPLSATIMSE  
 GmPHT1;6 : 141 GGDYPLSATIMSE  
 GmPHT1;10 : 141 GGDYPLSATIMSE  
 GmPHT1;1 : 142 GGDYPLSATIMSE  
 GmPHT1;5 : 142 GGDYPLSATIMSE  
 GmPHT1;3 : 141 GGDYPLSATIMSE  
 GmPHT1;14 : 141 GGDYPLSATIMSE  
 GmPHT1;8 : 142 GGDYPLSSTIMSE  
 GmPHT1;9 : 142 GGDYPLSSTIMSE  
 GmPHT1;12 : 140 GGDYPLSATIMSE  
 GmPHT1;13 : 140 GGDYPLSATIMSE  
 GmPHT1;11 : 141 GGDYPLSAVIMSE

B

| Site  | TM1 | TM2 | TM3 | TM4 | TM5 | TM6 | TM7 | TM8 | TM9 | TM10 | TM11 | TM12 |
|-------|-----|-----|-----|-----|-----|-----|-----|-----|-----|------|------|------|
| Begin | 80  | 109 | 136 | 169 | 206 | 248 | 346 | 393 | 421 | 446  | 486  | 523  |
| End   | 100 | 129 | 156 | 189 | 226 | 268 | 366 | 413 | 441 | 466  | 506  | 543  |
| Begin | 17  | 72  | 100 | 123 | 170 | 213 | 294 | 346 | 374 | 403  | 443  | 483  |
| End   | 37  | 92  | 120 | 143 | 190 | 233 | 314 | 366 | 394 | 423  | 463  | 503  |
| Begin | 17  | 72  | 100 | 124 | 170 | 213 | 295 | 347 | 373 | 404  | 444  | 484  |
| End   | 37  | 92  | 120 | 144 | 190 | 233 | 315 | 367 | 393 | 424  | 464  | 504  |
| Begin | 14  | 69  | 98  | 131 | 167 | 210 | 292 | 342 | 369 | 398  | 435  | 469  |
| End   | 34  | 89  | 118 | 151 | 187 | 230 | 312 | 362 | 389 | 418  | 455  | 489  |
| Begin | 17  | 72  | 100 | 123 | 170 | 213 | 291 | 343 | 369 | 400  | 442  | 480  |
| End   | 37  | 92  | 120 | 143 | 190 | 233 | 311 | 363 | 389 | 420  | 462  | 500  |
| Begin | 17  | 72  | 100 | 123 | 170 | 213 | 292 | 344 | 370 | 401  | 443  | 481  |
| End   | 37  | 92  | 120 | 143 | 190 | 233 | 312 | 364 | 390 | 421  | 463  | 501  |
| Begin | 17  | 72  | 100 | 123 | 170 | 213 | 291 | 343 | 369 | 400  | 442  | 480  |
| End   | 37  | 92  | 120 | 143 | 190 | 233 | 311 | 363 | 389 | 420  | 462  | 500  |
| Begin | 17  | 71  | 99  | 123 | 161 | 212 | 293 | 346 | 372 | 400  | 442  | 470  |
| End   | 37  | 91  | 119 | 143 | 181 | 232 | 313 | 366 | 392 | 420  | 462  | 490  |
| Begin | 17  | 71  | 99  | 123 | 161 | 212 | 293 | 346 | 372 | 400  | 442  | 470  |
| End   | 37  | 91  | 119 | 143 | 181 | 232 | 313 | 366 | 392 | 420  | 462  | 490  |
| Begin | 17  | 72  | 100 | 124 | 169 | 213 | 295 | 347 | 373 | 401  | 446  | 483  |
| End   | 37  | 92  | 120 | 144 | 189 | 233 | 315 | 367 | 393 | 421  | 466  | 503  |
| Begin | 17  | 72  | 100 | 124 | 169 | 213 | 295 | 347 | 373 | 401  | 446  | 483  |
| End   | 37  | 92  | 120 | 144 | 189 | 233 | 315 | 367 | 393 | 421  | 466  | 503  |
| Begin | 16  | 71  | 99  | 122 | 161 | 212 | 294 | 346 | 372 | 403  | 445  | 483  |
| End   | 36  | 91  | 119 | 142 | 181 | 232 | 314 | 366 | 392 | 423  | 465  | 503  |
| Begin | 16  | 71  | 100 | 123 | 161 | 212 | 294 | 346 | 372 | 403  | 443  | 483  |
| End   | 36  | 91  | 120 | 143 | 181 | 232 | 314 | 366 | 392 | 423  | 463  | 503  |
| Begin | 15  | 67  | 99  | 133 | 171 | 199 | 282 | 329 | 357 | 389  | 429  | 465  |
| End   | 35  | 87  | 119 | 153 | 191 | 219 | 302 | 349 | 377 | 409  | 449  | 485  |
| Begin | 15  | 67  | 98  | 121 | 168 | 199 | 282 | 329 | 357 | 389  | 429  | 465  |
| End   | 35  | 87  | 118 | 141 | 188 | 219 | 302 | 349 | 377 | 409  | 449  | 485  |
| Begin | 14  | 70  | 100 | 132 | 160 | 211 | 293 | 343 | 370 | 397  | 444  | 469  |
| End   | 34  | 90  | 120 | 152 | 180 | 231 | 313 | 363 | 390 | 417  | 464  | 489  |
| Begin | 14  | 70  | 100 | 132 | 160 | 211 | 293 | 343 | 370 | 397  | 445  | 469  |
| End   | 34  | 90  | 120 | 152 | 180 | 231 | 313 | 363 | 390 | 417  | 465  | 489  |
| Begin | 24  | 71  | 99  | 123 | 161 | 212 | 293 | 345 | 371 | 411  | 452  | 486  |
| End   | 44  | 91  | 119 | 143 | 181 | 232 | 313 | 365 | 391 | 431  | 472  | 506  |

**Additional file 8.** Motifs and domains shared by the GmPHT1 and other PHT1 proteins. A, The alignment of PHT1 signature motifs. B, The sites of predicted transmembrane (TM) domains by TopPred 2

(<http://bioweb.pasteur.fr/seqanal/interfaces/toppred.html>).
